1 A genomic region containing *REC8* and *RNF212B* is associated with individual  
2 recombination rate variation in a wild population of red deer (*Cervus elaphus*).

3 Susan E. Johnston, Jisca Huisman and Josephine M. Pemberton

4 Institute of Evolutionary Biology, University of Edinburgh, Edinburgh, EH9 3FL, United Kingdom.

5 Corresponding author: Susan.Johnston@ed.ac.uk

## 6 Abstract

7 Recombination is a fundamental feature of sexual reproduction, ensuring proper disjunction,  
8 preventing mutation accumulation and generating new allelic combinations upon which selec-  
9 tion can act. However it is also mutagenic, and breaks up favourable allelic combinations pre-  
10 viously built up by selection. Identifying the genetic drivers of recombination rate variation is a  
11 key step in understanding the causes and consequences of this variation, how loci associated  
12 with recombination are evolving and how they affect the potential of a population to respond to  
13 selection. However, to date, few studies have examined the genetic architecture of recombina-  
14 tion rate variation in natural populations. Here, we use pedigree data from ~2,600 individuals  
15 genotyped at ~38,000 SNPs to investigate the genetic architecture of individual autosomal re-  
16 combination rate in a wild population of red deer (*Cervus elaphus*). Female red deer exhibited  
17 a higher mean and phenotypic variance in autosomal crossover counts (ACC). Animal models  
18 fitting genomic relatedness matrices showed that ACC was heritable in females ( $h^2 = 0.12$ ) but  
19 not in males. A regional heritability mapping approach showed that almost all heritable varia-  
20 tion in female ACC was explained by a genomic region on deer linkage group 12 containing the  
21 candidate loci *REC8* and *RNF212B*, with an additional region on linkage group 32 containing  
22 *TOP2B* approaching genome-wide significance. The *REC8/RNF212B* region and its paralogue  
23 *RNF212* have been associated with recombination in cattle, mice, humans and sheep. Our  
24 findings suggest that mammalian recombination rates have a relatively conserved genetic ar-  
25 chitecture in both domesticated and wild systems, and provide a foundation for understanding  
26 the association between recombination loci and individual fitness within this population.

## 27 Introduction

28 Meiotic recombination (or crossing-over) is a fundamental feature of sexual reproduction and  
29 an important driver of diversity in eukaryotic genomes (FELSENSTEIN, 1974; BARTON and  
30 CHARLESWORTH, 1998). It has several benefits: it ensures the proper disjunction of homol-  
31 ogous chromosomes during meiosis (HASSOLD and HUNT, 2001), prevents mutation accumu-  
32 lation (MULLER, 1964) and generates novel haplotypes, increasing the genetic variance for fit-  
33 ness and increasing the speed and degree to which populations respond to selection (HILL and  
34 ROBERTSON, 1966; BATTAGIN *et al.*, 2016). However, recombination can also come at a cost:  
35 it requires the formation of DNA double strand breaks which increase the risk of local muta-  
36 tion and chromosomal rearrangements (INOUE and LUPSKI, 2002; ARBEITHUBER *et al.*, 2015);  
37 it can also break up favourable allele combinations previously built up by selection, reducing  
38 the mean fitness of successive generations (BARTON and CHARLESWORTH, 1998). Therefore,  
39 as the relative costs and benefits of recombination vary within different selective contexts, it is  
40 expected that recombination rates should vary within and between populations (BURT, 2000;  
41 OTTO and LENORMAND, 2002). Indeed, recent studies have shown that recombination rates  
42 can vary within and between chromosomes (i.e. recombination “hotspots”; MYERS *et al.* 2005),  
43 individuals (KONG *et al.*, 2004), populations (DUMONT *et al.*, 2011) and species (STAPLEY *et al.*,  
44 2017).

45 Genomic studies in humans, cattle, sheep and mice have shown that variation in recombination  
46 rate is often heritable, and may have a conserved genetic architecture (KONG *et al.*, 2014; MA  
47 *et al.*, 2015; JOHNSTON *et al.*, 2016; PETIT *et al.*, 2017). The loci *RNF212*, *REC8* and *HEI10*,  
48 amongst others, have been identified as candidates driving variation in rate, with *PRDM9* driving  
49 recombination hotspot positioning in mammals (BAUDAT *et al.*, 2010; BAKER *et al.*, 2017). This  
50 oligogenic architecture suggests that recombination rates and landscapes have the potential to  
51 evolve rapidly under different selective scenarios, in turn affecting the rate at which populations  
52 respond to selection (BARTON and CHARLESWORTH, 1998; BURT, 2000; OTTO and BARTON,  
53 2001; GONEN *et al.*, 2017). However, it remains unclear how representative the above studies  
54 are of recombination rate variation and its genetic architecture in natural populations. For exam-  
55 ple, experimental and domesticated populations tend to be subject to strong selection and have  
56 small effective population sizes, both of which have been shown theoretically to indirectly select  
57 for increased recombination rates to escape Hill-Robertson interference (OTTO and BARTON

58 2001; OTTO and LENORMAND 2002; but see MUÑOZ-FUENTES *et al.* 2015). Therefore, it may  
59 be that prolonged artificial selection results in different recombination dynamics and underlying  
60 genetic architectures. As broad recombination patterns are characterised in greater numbers  
61 of natural systems (JOHNSTON *et al.*, 2016, 2017; THEODOSIOU *et al.*, 2016; KAWAKAMI *et al.*,  
62 2017), it is clear that broad and fine-scale recombination rates and landscapes can vary to a  
63 large degree even within closely related taxa (STAPLEY *et al.*, 2017). Therefore, determining  
64 the genetic architecture of recombination rate in non-model, natural systems are key to eluci-  
65 dating the broad evolutionary drivers of recombination rate variation and quantifying its costs  
66 and benefits at the level of the individual.

67 In this study, we investigate the genetic basis of recombination rate variation in a wild popu-  
68 lation of Red deer (*Cervus elaphus*) on the island of Rum, Scotland (CLUTTON-BROCK *et al.*,  
69 1982). This population has been subject to a long term study since the early 1970s, with ex-  
70 tensive pedigree and genotype information for ~2,600 individuals at >38,000 SNPs (HUISMAN  
71 *et al.*, 2016; JOHNSTON *et al.*, 2017). We use this dataset to identify autosomal crossover rates  
72 and their genetic architecture in >1,300 individuals. The aims of the study are as follows: (a)  
73 to determine which common environmental and individual effects, such as age and sex, af-  
74 fect individual recombination rates; (b) to determine if recombination rate is heritable; and (c)  
75 to identify genomic regions that are associated with recombination rate variation. Addressing  
76 these objectives will provide a foundation for future studies investigating the association be-  
77 tween the genetic architecture of recombination rate and individual fitness, to determine how  
78 this trait evolves within contemporary natural populations.

## 79 **Materials and Methods**

### 80 **Study population and genomic dataset.**

81 The study population of red deer is situated in the North Block of the Isle of Rum, Scotland  
82 (57°02'N, 6°20'W) and has been subject to individual monitoring since 1971 (CLUTTON-BROCK  
83 *et al.*, 1982). Research was conducted following approval of the University of Edinburgh's An-  
84 imal Welfare and Ethical Review Body and under appropriate UK Home Office licenses. DNA  
85 was extracted from neonatal ear punches, cast antlers and post-mortem tissue (see HUISMAN

86 *et al.*, 2016 for full details). DNA samples from 2880 individuals were genotyped at 50,541  
87 SNP loci on the Cervine Illumina BeadChip (BRAUNING *et al.*, 2015) using an Illumina genotyp-  
88 ing platform (Illumina Inc., San Diego, CA, USA). SNP genotypes were scored using Illumina  
89 GenomeStudio software, and quality control was carried out using the *check.marker* function in  
90 GenABEL v1.8-0 (AULCHENKO *et al.*, 2007) in R v3.3.2, with the following thresholds: SNP  
91 genotyping success >0.99, SNP minor allele frequency >0.01, and ID genotyping success  
92 >0.99, with 38,541 SNPs and 2,631 IDs were retained. There were 126 pseudoautosomal  
93 SNPs identified on the X chromosome (i.e. markers showing autosomal inheritance patterns).  
94 Heterozygous genotypes within males at non-pseudoautosomal X-linked SNPs were scored as  
95 missing. A pedigree of 4,515 individuals has been constructed using microsatellite and SNP  
96 data using the software Sequoia (see HUISMAN, 2017). The genomic inbreeding coefficient  
97 ( $\hat{F}_{III}$ ), was calculated for each deer in the software GCTA v1.24.3 (YANG *et al.*, 2011), using  
98 information for all autosomal SNP loci passing quality control. A linkage map of 38,083 SNPs  
99 has previously been constructed, with marker orders and estimated base-pair positions known  
100 for all 33 autosomes (CEL1 to CEL33) and the X chromosome (CEL34) (JOHNSTON *et al.*, 2017  
101 and data archive doi:10.6084/m9.figshare.5002562). All chromosomes are acrocentric with the  
102 exception of one metacentric autosome (CEL5).

### 103 **Quantification of meiotic crossovers.**

104 A standardised sub-pedigree approach was used to identify the positions of meiotic crossovers  
105 (JOHNSTON *et al.*, 2016). The full pedigree was split as follows: for each focal individual (FID)  
106 and offspring pair, a sub-pedigree was constructed that included the FID, its mate, parents and  
107 offspring (Figure S1), where all five individuals were genotyped on the SNP chip. This pedigree  
108 structure allows phasing of SNPs within the FID, characterising the crossovers occurring in the  
109 gamete transferred from the FID to the offspring. All remaining analyses outlined in this section  
110 were conducted in the software CRI-MAP v2.504a (GREEN *et al.*, 1990) within the R package  
111 crimaptools v0.1 (JOHNSTON *et al.*, 2017) implemented in R v3.3.2. Mendelian incompatibilities  
112 within sub-pedigrees were identified using the *prepare* function and removed from all affected  
113 individuals; sub-pedigrees containing more than 0.1% mismatching loci between parents and  
114 offspring were discarded. The *chrompic* function was used to identify the grand-parental phase  
115 of SNP alleles on chromosomes transmitted from the FID to the offspring, and to provide a  
116 sex-averaged linkage map. Switches in phase indicated the position of a crossover (Figure

117 S1). Individuals with high numbers of crossovers per gamete (>60) were assumed to have  
118 widespread phasing errors and were removed from the analysis.

119 Errors in determining allelic phase can lead to incorrect calling of double crossovers (i.e.  $\geq$   
120 2 crossovers occurring on the same chromosome) over short map distances. To reduce the  
121 likelihood of calling false double crossover events, phased runs consisting of a single SNP were  
122 recoded as missing (390 out of 7652 double crossovers; Figure S2) and *chrompic* was rerun.  
123 Of the remaining double crossovers, those occurring over distances of  $\leq 10\text{cM}$  (as measured  
124 by the distance between markers immediately flanking the double crossover) were recoded as  
125 missing (170 out of 6959 double crossovers). After this process, 1341 sub-pedigrees were  
126 passed quality control, characterising crossovers in gametes transmitted to 482 offspring from  
127 81 unique males and 859 offspring from 256 unique females.

## 128 Genetic architecture of recombination rate variation.

129 **Heritability and cross-sex genetic correlation.** Autosomal crossover count (ACC) was mod-  
130 elled as a trait of the FID. A restricted maximum-likelihood (REML) “animal model” approach  
131 (HENDERSON, 1975) was used to partition phenotypic variance and examine the effect of fixed  
132 effects on ACC; these were implemented in ASReml-R (BUTLER *et al.*, 2009) in R v3.3.2. The  
133 additive genetic variance was calculated by fitting a genomic relatedness matrix (GRM) con-  
134 structed for all autosomal markers in GCTA v1.24.3 (YANG *et al.*, 2011); the GRM was adjusted  
135 assuming similar frequency spectra of genotyped and causal loci using the argument `--grm-adj`  
136 `0`. There was no pruning of related individuals from the GRM (i.e. we did not use the `--grm-cutoff`  
137 argument) as there is substantial relatedness within the population, and initial models included  
138 parental effects and common environment which controls for effects of shared environments  
139 between relatives. ACC was modelled first using a univariate model:

$$y = X\beta + Z_1a + Z_r y_r + e$$

140 where  $y$  is a vector of ACC;  $X$  is an incidence matrix relating individual measures to a vector  
141 of fixed effects,  $\beta$ ;  $Z_1$ , and  $Z_r$  are incidence matrices relating individual measures with additive  
142 genetic and random effects, respectively;  $a$  and  $u_r$  are vectors of GRM additive genetic and  
143 additional random effects, respectively; and  $e$  is a vector of residual effects. The narrow-sense

144 heritability  $h^2$  was calculated as the ratio of the additive genetic variance to the sum of vari-  
145 ance components estimated for all random effects. Model structures were tested with several  
146 fixed effects, including sex,  $\hat{F}_{III}$  and FID age; random effects included individual identity (i.e.  
147 permanent environment) to account for repeated measures in the same FID, maternal and pa-  
148 ternal identity, and common environment effects of FID birth year and offspring birth year. The  
149 significance of fixed effects was tested with a Wald test, and the significance of random effects  
150 was calculated using likelihood-ratio tests (LRT, distributed as  $\chi^2$  with 1 degree of freedom)  
151 between models with and without the focal random effect. Only sex and additive genetic effects  
152 were significant in any model, but  $\hat{F}_{III}$  and individual identity were retained in all models to  
153 account for possible underestimation of ACC and pseudoreplication, respectively. As the vari-  
154 ance in recombination rates differed between the sexes, models were also run within each sex  
155 separately

156 Bivariate models of male and female ACC were run to determine whether additive genetic vari-  
157 ation was associated with sex-specific variation and the degree to which this was correlated  
158 between the sexes. The additive genetic correlation  $r_A$  was determined using the CORGH  
159 error-structure function in ASReml-R (correlation with heterogeneous variances) with  $r_A$  set to  
160 be unconstrained. Model structure was otherwise the same as for univariate models. To deter-  
161 mine whether genetic correlations were significantly different from 0 and 1, the unconstrained  
162 model was compared with models where  $r_A$  was fixed at values of 0 or 0.999. Differences in  
163 additive genetic variance in males and females were tested by constraining both to be equal  
164 values using the CORGV error-structure function in ASReml-R. Models then were compared  
165 using LRTs with 1 degree of freedom.

166 **Genome-wide association study** Genome-wide association studies (GWAS) of ACC were  
167 conducted using the function  $rGLS$  in the R library RepeatABEL v1.1 (RÖNNEGÅRD *et al.*, 2016)  
168 implemented in R v3.3.2. This function accounts for population structure by fitting the GRM as  
169 a random effect, and allows fitting of repeated phenotypic measures per individual. Models  
170 were run including sex and  $\hat{F}_{III}$  as fixed effects; sex-specific models were also run. Associa-  
171 tion statistics were corrected for inflation due to population stratification that was not captured  
172 by the GRM, by dividing them by the genomic control parameter  $\lambda$ , which was calculated as  
173 the observed median  $\chi^2$  statistic divided by the null expectation median  $\chi^2$  statistic (DEVLIN  
174 *et al.*, 1999). The significance threshold after multiple testing was calculated using a linkage

175 disequilibrium (LD) based approach in the software  $K_{effective}$  (MOSKVINA and SCHMIDT, 2008)  
176 specifying a sliding window of 50 SNPs. The effective number of tests was calculated as 35,264,  
177 corresponding to a P value of  $1.42 \times 10^{-06}$  at  $\alpha = 0.05$ . GWAS of ACC included the X chromo-  
178 some and 458 SNP markers of unknown position. It is possible that some SNPs may show an  
179 association with ACC if they are in LD with polymorphic recombination hotspots (i.e. associa-  
180 tions in *cis*), rather than SNPs associated with recombination rate globally across the genome  
181 (i.e. associations in *trans*). Therefore, we repeated the GWAS modelling *trans* variation only, by  
182 examining associations between each SNP and ACC, minus the crossovers that occurred on  
183 the same chromosome as the SNP. For example, if the focal SNP occurred on linkage group 1,  
184 association was tested with ACC summed over linkage groups 2-33. In this case, similar results  
185 were obtained for both approaches, indicating that all associations affect recombination rate  
186 variation in *trans* across the genome. Marker positions are known relative to the cattle genome  
187 vBTA\_vUMD\_3.1; in cases of significant associations with recombination rate, gene annota-  
188 tions and positions were obtained from Ensembl (Cattle gene build ID BTA\_vUMD\_3.1.89). LD  
189 was calculated between loci in significantly associated regions using the allelic correlation  $r^2$  in  
190 the R package LDheatmap v0.99-2 (SHIN *et al.*, 2006) in R v3.3.2.

191 **Regional heritability analysis** As a single locus approach, GWAS has reduced power to de-  
192 tect variants with small effect sizes and/or have low linkage disequilibrium with causal mutations  
193 (YANG *et al.*, 2011). Partitioning additive genetic variance within specific genomic regions (i.e.  
194 a regional heritability approach) incorporates haplotype effects and determines the proportion  
195 of phenotypic variance explained by defined regions. The additive genetic variance was par-  
196 titioned across all autosomes in sliding windows of 20 SNPs (with an overlap of 10 SNPs) as  
197 follows (NAGAMINE *et al.*, 2012; BÉRÉDOS *et al.*, 2015):

$$y = X\beta + Z_1v_i + Z_2nv_i + Z_ru_r + e$$

198 where  $y$  is a vector of ACC;  $X$  is an incidence matrix relating individual measures to a vector of  
199 fixed effects,  $\beta$ ;  $v$  is a vector of additive genetic effects explained by autosomal genomic region  
200 in window  $i$ ;  $nv$  is the vector of the additive genetic effects explained by all remaining autosomal  
201 markers outside window  $i$ ;  $Z_1$ , and  $Z_2$  are incidence matrices relating individual measures with  
202 additive genetic effects for the focal window and the rest of the genome, respectively;  $Z_r$  is

203 an incidence matrix relating individual measures with additional random effects, where  $u_r$  is a  
204 vector of additional random effects; and  $e$  is a vector of residual effects. The mean window  
205 size was  $1.29 \pm 0.32$  Mb. Models were implemented in ASReml-R (BUTLER *et al.*, 2009) in R  
206 v3.3.2. GRMs were constructed in the software GCTA v1.24.3 with the argument `--grm-adj 0`  
207 (YANG *et al.*, 2011). The significance of additive genetic variance for window  $i$  was tested by  
208 comparing models with and without the  $Z_1 v_i$  term with LRT ( $\chi_1^2$ ). To correct for multiple testing,  
209 a Bonferroni approach was used, taking the number of windows and dividing by 2 to account  
210 for window overlap; the threshold P-value was calculated as  $2.95 \times 10^{-5}$  at  $\alpha = 0.05$ . In the  
211 most highly associated region, this analysis was repeated for windows of 20, 10 and 6 SNPs in  
212 sliding windows overlapping by  $n - 1$  SNPs in order to fine map the associated regions. This  
213 was carried out from approximately 5MB before and after the significant region.

214 **Accounting for sample size difference between males and females.** Sample sizes within  
215 this dataset are markedly different between males and females (see above and Table 1). A  
216 consequence of this may be that there is lower power to detect associations with male recombina-  
217 tion rate. We repeated the heritability and GWAS analyses in sampled datasets of the same  
218 size within each sex. Briefly, 482 recombination rate measures (representing the total number  
219 in males) were sampled with replacement within the male and female datasets, and the animal  
220 model and GWAS analyses were repeated in the sampled dataset. This process was repeated  
221 100 times, with sampling carried out in R v3.3.2. The observed and simulated heritabilities com-  
222 pared to see how often a similar results would be obtained. This was repeated for association  
223 at the most highly associated GWAS SNPs and regional heritability regions. The differences  
224 between the mean simulated values in each sex were investigated using a Welch two-sample  
225 t-test assuming unequal variances.

226 **Haplotyping and effect size estimation.** Haplotype construction was carried out to exam-  
227 ine haplotype variation within regions significantly associated with recombination rate variation  
228 in the regional heritability analysis. SNP data from deer linkage group 12 was phased using  
229 SHAPEIT v2.r837 (DELANEAU *et al.*, 2012), specifying the linkage map positions and recombina-  
230 tion rates for each locus. This analysis used pedigree information with the `--duohmm` flag to  
231 allow the use of pedigree information in the phasing process (O'CONNELL *et al.*, 2014). Haplo-  
232 types were then extracted for the most significant window from the regional heritability analysis  
233 (see Results).



234 Effect sizes on ACC for the top GWAS SNPs were estimated using animal models in ASReml-  
235 R; SNP genotype was fit as a fixed factor, with pedigree relatedness fit as a random effect to  
236 account for the additive genetic variance. To determine the effect sizes on ACC for the regional  
237 heritability analysis, animal models were run as follows: for a given haplotype, A, its effect was  
238 estimated relative to all other haplotypes combined, i.e. treating them as a single allele, B, by  
239 fitting genotypes A/A, A/B and B/B as a fixed factor. This was repeated for each haplotype allele  
240 where more than 10 copies were present in the full dataset.

## 241 **Data availability**

242 Raw data are publicly archived at doi:10.6084/m9.figshare.5002562 (JOHNSTON *et al.*, 2017).  
243 Code for the analysis is archived at [https://github.com/susjoh/Deer\\_Recombination\\_GWAS](https://github.com/susjoh/Deer_Recombination_GWAS).

## 244 Results

### 245 Variation and heritability in autosomal crossover count.

246 Autosomal crossover count (ACC) was significantly higher in females than in males, where fe-  
 247 males had  $4.32 \pm 0.41$  more crossovers per gamete (animal model,  $Z = 10.57$ ,  $P_{Wald} < 0.001$ ;  
 248 Figure 1); there was no effect of FID age or inbreeding on ACC ( $P > 0.05$ , Table S1). Females  
 249 had significantly higher phenotypic variance in ACC than males ( $V_P = 32.02$  and  $15.33$ , respec-  
 250 tively; Table 1). ACC was significantly heritable in both sexes combined ( $h^2 = 0.13$ ,  $SE = 0.05$ ,  
 251  $P = 0.002$ ) and within females only ( $h^2 = 0.11$ ,  $SE = 0.06$ ,  $P = 0.033$ ), but was not heritable in  
 252 males ( $P > 0.05$ ; Table 1). The remaining phenotypic variance was explained by the residual er-  
 253 ror term, and there was no variance explained by the permanent environment effect, birth year,  
 254 year of gamete transmission, or parental identities of the FID in any model (animal models  $P$   
 255  $> 0.05$ ). Bivariate models of ACC between the sexes indicated that the genetic correlation ( $r_a$ )  
 256 between males and females was  $0.346$ , but that it not significantly different from zero or one  
 257 ( $P_{LRT} > 0.05$ ). This may be due to the relatively small sample size of this dataset resulting in  
 258 a large standard error around the  $r_A$  estimate, or the fact that ACC was not heritable in males.  
 259 Sampling of 482 measures from each sex showed no difference in the heritability estimates be-  
 260 tween the sexes in this smaller dataset, indicating reduced power to quantify heritable variation  
 261 in the smaller male dataset ( $t = 0.242$ ,  $P = 0.810$ , Figure S3).

**Table 1:** Data set information and animal model results for autosomal crossover count (ACC). Numbers in parentheses are the standard error, except for *Mean*, which is the standard deviation.  $N_{OBS}$ ,  $N_{FID}$  and  $N_{xovers}$  are the number of ACC measures, the number of focal individuals (FIDs) and the total number of crossovers in the dataset. The mean ACC was calculated from the raw data.  $V_P$  and  $V_A$  are the phenotypic variance and additive genetic variance, respectively.  $h^2$ ,  $pe^2$  and  $e^2$  are the narrow-sense heritability, the permanent environment effect, and the residual effect, respectively; all are calculated as the proportion of  $V_P$  that they explain. The additive genetic components were modelled using genomic relatedness matrices.  $P(h^2)$  is the significance of the  $V_A$  term in the model as determined using a likelihood ratio test.

| Analysis | $N_{OBS}$ | $N_{FID}$ | Mean            | $N_{xovers}$ | $V_P$           | $V_A$          | $h^2$          | $pe^2$         | $e^2$          | $P(h^2)$ |
|----------|-----------|-----------|-----------------|--------------|-----------------|----------------|----------------|----------------|----------------|----------|
| Both     | 1341      | 337       | 25.03<br>(5.49) | 34911        | 26.42<br>(1.17) | 3.46<br>(1.34) | 0.13<br>(0.05) | 0.05<br>(0.04) | 0.82<br>(0.03) | 0.002    |
| Females  | 859       | 256       | 26.62<br>(5.62) | 24025        | 32.02<br>(1.67) | 3.46<br>(1.87) | 0.11<br>(0.06) | 0.05<br>(0.05) | 0.84<br>(0.04) | 0.033    |
| Males    | 482       | 81        | 22.21<br>(3.88) | 10886        | 15.33<br>(1.09) | 1.03<br>(1.66) | 0.07<br>(0.11) | 0.06<br>(0.1)  | 0.87<br>(0.05) | 0.554    |

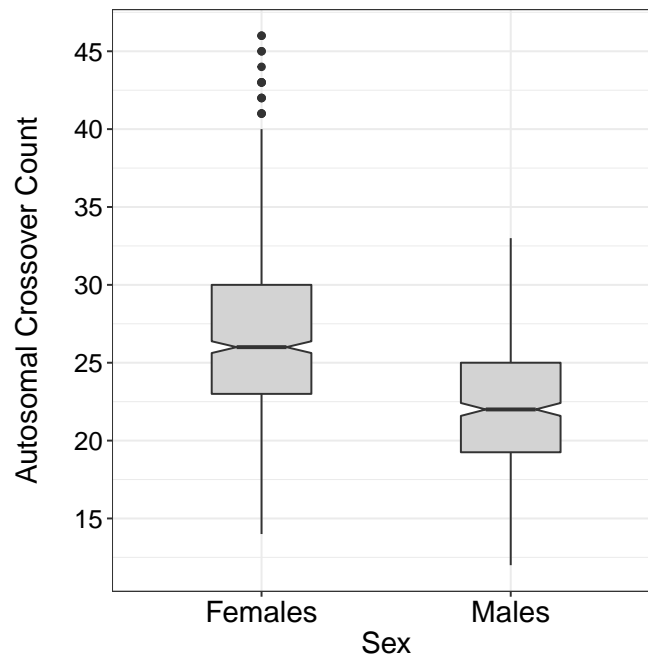

**Figure 1:** Distribution of ACCs in the raw data for females and males.

## 262 Genetic architecture of autosomal crossover count.

263 **Genome-wide association study.** No SNPs were significantly associated with ACC at the  
264 genome-wide level (Figure 2, Tables 2 and S2). The most highly associated SNP in both sexes  
265 was *cela1\_red\_10\_26005249* on deer linkage group 12 (CEL12), corresponding to position  
266 26,005,249 on cattle chromosome 10 (BTA10). This marker was also the most highly asso-  
267 ciated SNP when considering recombination in *trans*, indicating that this region affects ACC  
268 across the genome (Table S2). The observed association was primarily driven by female ACC  
269 (Table 2, Figure 2). In females, the most highly associated SNP was *cela1\_red\_10\_25661750*  
270 on CEL12, corresponding to position 25,661,750 on BTA10. For both SNPs, sampling of 482  
271 measures from each sex showed that the observed associations were significantly higher in  
272 females than in males when considering the same sample size (*cela1\_red\_10\_25661750*:  $t$   
273 = 18.60,  $P < 0.001$ ; *cela1\_red\_10\_26005249*:  $t = 4.89$ ,  $P < 0.001$ ; Figure S4). Based on its  
274 position relative to the cattle genome, *cela1\_red\_10\_26005249* was ~600bp upstream of an  
275 olfactory receptor *OR5AU1* and ~24kb downstream from a gene of unknown function (ENSB-  
276 TAG00000011396). There were four candidate genes within 1Mb of both loci, including *TOX4*,  
277 *CHD8*, *SUPT16H* and *CCNB1IP1* (Figure 4; see Discussion).

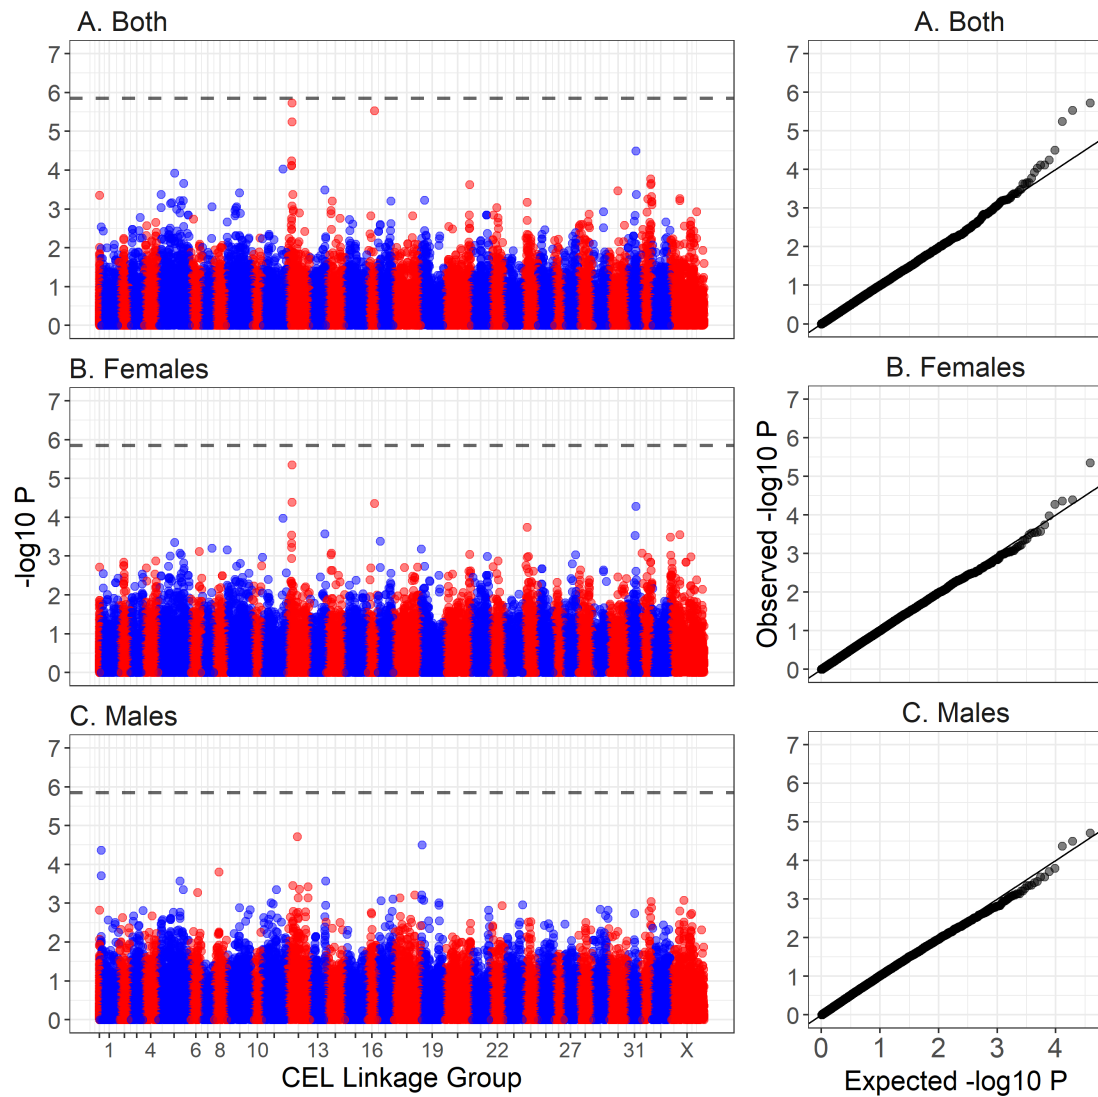

**Figure 2:** Manhattan plot of genome-wide association of autosomal crossover count (ACC) for (A) all deer, (B) females only and (C) males only. The dashed line is the genome-wide significance threshold equivalent to  $P < 0.05$ . The left-hand plots show association relative to the estimated genomic positions on deer linkage groups from JOHNSTON *et al.* (2017). Points have been colour coded by chromosome. The right-hand plots show the distribution of observed  $-\log_{10} P$  values against those under the null expectation. Association statistics have been corrected for the genomic control inflation factor  $\lambda$ . Underlying data are provided in Table S2 and sample sizes are given in Table 1.

**Table 2:** The top five most significant hits from a genome-wide association study of ACC in (A) Both sexes, (B) Females only and (C) Males only. No SNPs reached the genome-wide significance of  $P = 1.42 \times 10^{-06}$ . The SNP locus names indicate the position of the SNPs relative to the cattle genome assembly vBTA\_vJMD\_3.1 (indicated by *Chromosome\_Position*). Linkage groups and map positions (in centiMorgans, cM) are from JOHNSTON *et al.* (2017). A and B are the reference alleles. Effect B is the estimated effect and standard error of the B allele as estimated in RepeatABEL (RÖNNEGÅRD *et al.*, 2016). P-values have been corrected for the genomic inflation parameter  $\lambda$ . Full results are available in Table S2.

| Sex        | SNP Locus             | Deer Linkage Group | Map Position (cM) | A | B | Effect B | (SE) | $\chi^2_1$ | <i>P</i> | MAF  |
|------------|-----------------------|--------------------|-------------------|---|---|----------|------|------------|----------|------|
| A. Both    | cela1_red_10_26005249 | 12                 | 36.4              | G | A | 1.53     | 0.28 | 22.73      | 1.87e-06 | 0.33 |
|            | cela1_red_8_100681301 | 16                 | 43.5              | A | G | 6.42     | 1.19 | 21.87      | 2.91e-06 | 0.02 |
|            | cela1_red_10_25661750 | 12                 | 35.6              | A | G | 2.18     | 0.42 | 20.6       | 5.67e-06 | 0.1  |
|            | cela1_red_1_35423049  | 31                 | 46.2              | A | G | 1.4      | 0.29 | 17.31      | 3.18e-05 | 0.25 |
|            | cela1_red_10_21372438 | 12                 | 34.5              | A | G | 1.22     | 0.26 | 16.2       | 5.69e-05 | 0.42 |
| B. Females | cela1_red_10_25661750 | 12                 | 35.6              | A | G | 2.81     | 0.56 | 21.07      | 4.44e-06 | 0.1  |
|            | cela1_red_10_26005249 | 12                 | 36.4              | G | A | 1.58     | 0.35 | 16.84      | 4.07e-05 | 0.33 |
|            | cela1_red_8_100681301 | 16                 | 43.5              | A | G | 6.25     | 1.4  | 16.72      | 4.34e-05 | 0.02 |
|            | cela1_red_1_35423049  | 31                 | 46.2              | A | G | 1.62     | 0.37 | 16.37      | 5.22e-05 | 0.25 |
|            | cela1_red_11_91378678 | 11                 | 86.5              | A | G | 13.61    | 3.22 | 15.03      | 1.06e-04 | 0.02 |
| C. Males   | cela1_red_10_49732924 | 12                 | 52.6              | G | A | -2.9     | 0.66 | 18.25      | 1.94e-05 | 0.14 |
|            | cela1_red_1_128593904 | 19                 | 13.5              | G | A | -1.99    | 0.46 | 17.32      | 3.15e-05 | 0.18 |
|            | cela1_red_15_6941417  | 1                  | 8.9               | A | G | -1.93    | 0.46 | 16.74      | 4.28e-05 | 0.21 |
|            | cela1_red_2_101879999 | 8                  | 35.2              | G | A | 1.51     | 0.39 | 14.28      | 1.58e-04 | 0.44 |
|            | cela1_red_15_7417500  | 1                  | 9.2               | A | C | -1.93    | 0.5  | 13.9       | 1.93e-04 | 0.17 |

278 **Regional heritability analysis.** The genome-wide regional heritability analysis of ACC showed  
279 a significant association in both sexes and in females only with a ~2.94Mb region on CEL12  
280 (Figure 3, Table 3). The most highly associated window (~1.36 Mb) within this region contained  
281 42 genes, including REC8 meiotic recombination protein (*REC8*; 20,810,610 - 20,817,662 bp  
282 on BTA10). Detailed examination of this region in sliding windows of 6, 10 and 20 SNPs found  
283 the highest association at a 10 SNP window of ~463kb containing 36 genes, including *REC8*  
284 (Table 3). This region explained all heritable variation in recombination rate, with regional her-  
285 itability estimates of 0.143 (SE = 0.053) and 0.146 (SE = 0.045) for all deer and females only,  
286 respectively. The sex-specific effect was supported by sampling of 482 measures, where fe-  
287 males had consistently higher associations than in males ( $t = 19.03$ ,  $P < 0.001$ , Figure S5).  
288 The total significant region after detailed examination was ~3.01Mb wide, flanked by SNPs  
289 *cela1\_red\_10\_18871213* and *cela1\_red\_10\_21878407* (Figure 4 & Table S4) and containing  
290 ~87 genes. This wider region contained the protein coding region for ring finger protein 212B

291 (*RNF212B*; 21,466,337 - 21,494,696 bp on BTA10), a homologue of *RNF212*, which has been  
292 directly implicated in synapsis and crossing-over during meiosis in mice (REYNOLDS *et al.*,  
293 2013). Genetic variants at both *RNF212B* and *RNF212* have been associated with recombina-  
294 tion rate variation in humans, cattle and sheep (KONG *et al.*, 2008; MA *et al.*, 2015; JOHNSTON  
295 *et al.*, 2016; PETIT *et al.*, 2017). Whilst this region was close to the most highly associated  
296 SNPs from the genome-wide association study, there was no overlap between the two anal-  
297 yses, with the mostly highly associated regions separated by an estimated ~5.5Mb (Figure  
298 4). The mean  $r^2$  LD between the top regional heritability window and the top GWAS SNPs  
299 was 0.258 for *cela1\_red\_10\_25661750* and 0.276 for *cela1\_red\_10\_26005249*, with the top  $r^2$   
300 of 0.665 observed between the SNPs *cela1\_red\_10\_21807996* and *cela1\_red\_10\_26005249*  
301 (Figure 4).

302 A second region on linkage group 32 almost reached genome-wide significance in the regional  
303 heritability analysis, corresponding to the region ~38.7 - 41.3Mb on cattle chromosome 27.  
304 This region contained the locus topoisomerase (DNA) II beta (*TOP2B*); inhibitors of this gene  
305 lead to defects chromosome segregation and heterochromatin condensation during meiosis I  
306 in mice, *Drosophila melanogaster* and *Caenorhabditis elegans* (LI *et al.* 2013; GÓMEZ *et al.*  
307 2014; HUGHES and HAWLEY 2014; JARAMILLO-LAMBERT *et al.* 2016; Figure 3, Tables 3 and  
308 S3). Full results for the regional heritability analyses are provided in Tables S3 and S4.

**Table 3:** The most significant hits from a regional heritability analysis of ACC in (A) Both sexes, (B) Females only and (C) Males only. Sliding windows were 20 SNPs wide with an overlap of 10 SNPs. Lines in italics are the most highly associated regions from detailed examination of significant regions - in each case these are for 10 SNP windows. The  $\chi^2$  and P values are for likelihood ratio test comparisons between models with and without a genomic relatedness matrix for that window; values in bold type are significant the the genome-wide level. The SNP locus names indicate the position of the SNPs relative to the cattle genome assembly vBTA\_vUMD\_3.1 (indicated by *Chromosome\_Position*). Full results are available in Tables S3 & S4.

| Sex        | Deer Linkage Group | $\chi_1^2$   | P               | First SNP                    | Last SNP                     | Region $h^2$ | SE           |
|------------|--------------------|--------------|-----------------|------------------------------|------------------------------|--------------|--------------|
| A. Both    | <i>12</i>          | <i>32.30</i> | <i>1.32e-08</i> | <i>cela1_red_10_20476277</i> | <i>cela1_red_10_20939342</i> | <i>0.143</i> | <i>0.053</i> |
|            | 12                 | 28.62        | 8.81e-08        | cela1_red_10_19617695        | cela1_red_10_20977030        | 0.080        | 0.043        |
|            | 12                 | 25.11        | 5.41e-07        | cela1_red_10_20519507        | cela1_red_10_21807996        | 0.080        | 0.045        |
|            | 12                 | 22.91        | 1.70e-06        | cela1_red_10_18871213        | cela1_red_10_20476277        | 0.105        | 0.055        |
|            | 32                 | 16.55        | 4.73e-05        | cela1_red_27_38731584        | cela1_red_27_40264086        | 0.056        | 0.034        |
|            | 32                 | 15.76        | 7.21e-05        | cela1_red_27_39821973        | cela1_red_27_41274975        | 0.071        | 0.045        |
| B. Females | <i>12</i>          | <i>28.14</i> | <i>1.13e-07</i> | <i>cela1_red_10_20476277</i> | <i>cela1_red_10_20939342</i> | <i>0.146</i> | <i>0.045</i> |
|            | 12                 | 24.34        | 8.06e-07        | cela1_red_10_19617695        | cela1_red_10_20977030        | 0.089        | 0.048        |
|            | 12                 | 23.5         | 1.25e-06        | cela1_red_10_20519507        | cela1_red_10_21807996        | 0.102        | 0.056        |
|            | 12                 | 20.03        | 7.61e-06        | cela1_red_10_18871213        | cela1_red_10_20476277        | 0.133        | 0.068        |
|            | 12                 | 13.72        | 2.12e-04        | cela1_red_10_21000545        | cela1_red_10_22450693        | 0.089        | 0.054        |
|            | 12                 | 12.32        | 4.49e-04        | cela1_red_10_21878407        | cela1_red_10_26041475        | 0.177        | 0.087        |
| C. Males   | 5                  | 14.07        | 1.76e-04        | cela1_red_19_15289588        | cela1_red_19_16108226        | 0.133        | 0.052        |
|            | 5                  | 12.61        | 3.84e-04        | cela1_red_19_15753501        | cela1_red_19_16923111        | 0.137        | 0.058        |
|            | 20                 | 8.77         | 3.06e-03        | cela1_red_3_110763634        | cela1_red_3_112123206        | 0.142        | 0.085        |
|            | 32                 | 8.51         | 3.52e-03        | cela1_red_27_38731584        | cela1_red_27_40264086        | 0.119        | 0.076        |
|            | 1                  | 8.21         | 4.17e-03        | cela1_red_15_6354196         | cela1_red_15_7482634         | 0.123        | 0.056        |

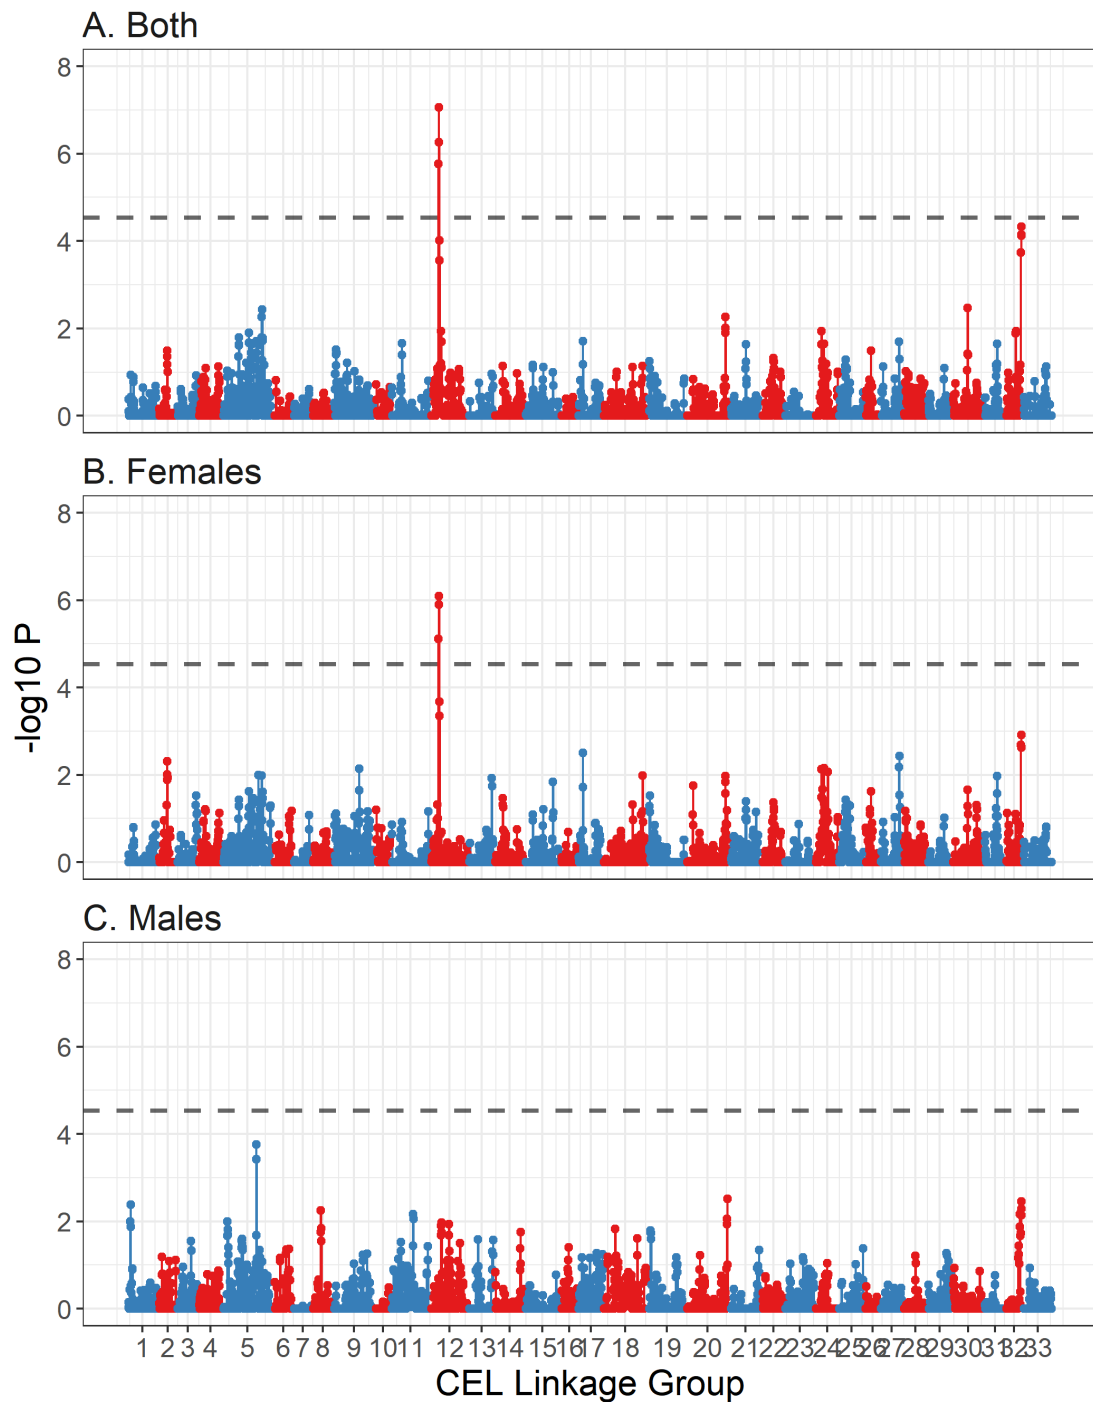

**Figure 3:** Regional heritability plot of association of autosomal crossover count for (A) all deer, (B) females only and (C) males only. Each point represents a sliding window of 20 SNPs with an overlap of 10 SNPs. The dashed line is the genome-wide significance threshold equivalent to  $P < 0.05$  as calculated using Bonferroni. Lines have been colour coded by chromosome. Underlying data are provided in Table 3.



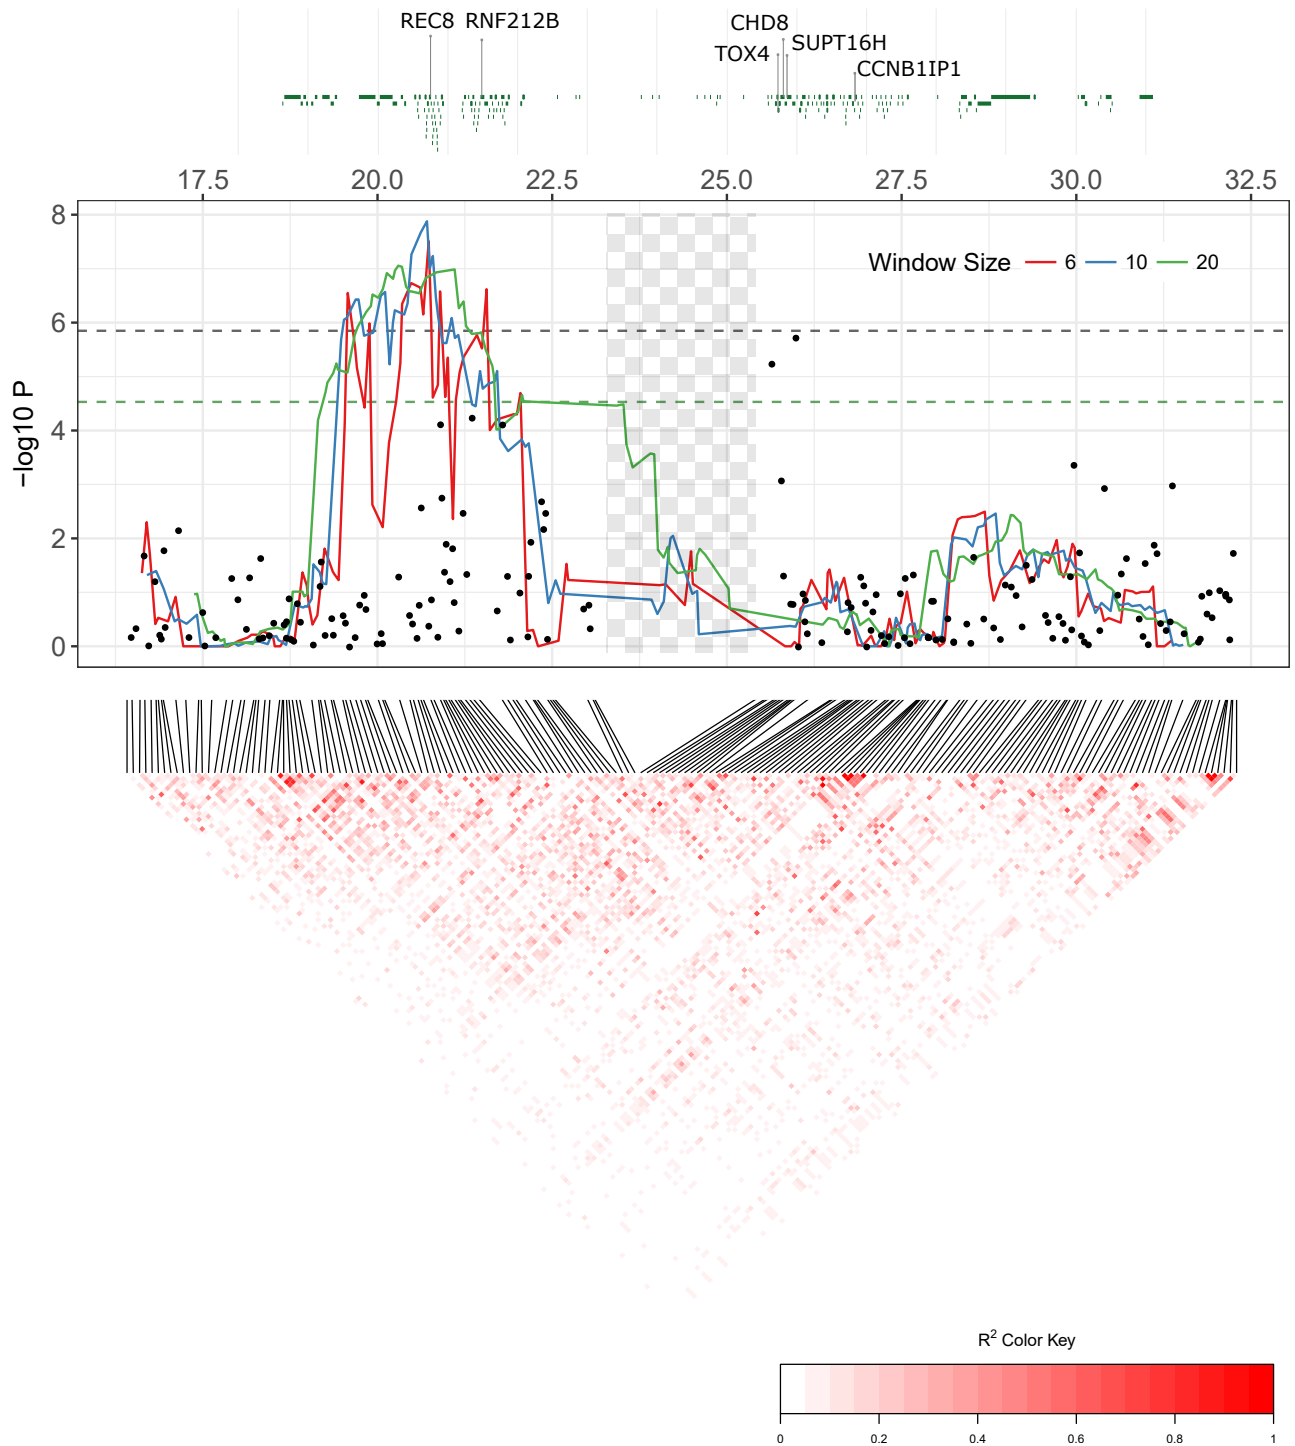

**Figure 4:** Detailed figure of genes, association statistics and linkage disequilibrium patterns at the most highly associated region on on CEL12 (homologous to BTA10) for all deer of both sexes. All X-axis positions are given relative to the cattle genome vBTA\_vUMD\_3.1. The top panel shows protein coding regions, with annotation for candidate loci. The central panel shows the results for the regional heritability analysis (where lines represents a sliding windows of 6, 10 and 20 SNPs with an overlap of n-1 SNPs) and the genome-wide association study (where points indicate single SNP associations). The dashed lines are the genome-wide significance thresholds (green = regional heritability, black = genome-wide association). The checked shaded area shows the position of the T cell receptor alpha/delta locus (see Discussion). Underlying data are provided in Table S4. The lower panel shows linkage disequilibrium between each loci using allelic correlations ( $r^2$ ).

309 **Effect size estimation.** At most highly associated GWAS SNP, *cela1\_red\_10\_26005249*, car-  
310 rying one or two copies of the G allele conferred 3.3 to 3.9 fewer crossovers per gamete in  
311 females (Wald  $P < 0.001$ ) and 1.8 - 2.8 fewer crossovers per gamete in males ( $P = 0.009$ ; Table  
312 4). The most highly associated SNP in females, *cela1\_red\_10\_25661750*, had a significant  
313 effect on ACC in females ( $P < 0.001$ ) but not in males ( $P > 0.05$ ; Table 4). This locus conferred  
314 2.03 more crossovers in A/G females and 13.68 more in G/G females; however, the latter cat-  
315 egory contained 7 unique measures in only two individuals, and so this estimate is likely to be  
316 subject to strong sampling error.

317 A total of 17 haplotypes in the 10 SNP region spanning *cela1\_red\_10\_20476277* and *cela1\_red\_10\_20939342*  
318 had more than ten copies in unique individual females (Table S5). Of these, two haplotypes,  
319 AGGAGAGAAG and AGAGAAGAGA, had a significant effect on ACC relative to all other hap-  
320 lotypes (Tables 4 and S5, Figure S6). Haplotype AGGAGAGAAG increased female ACC by 2.4  
321 crossovers per gamete in heterozygotes ( $P < 0.001$ ); homozygotes for the haplotype were rare  
322 (13 measures in 4 individuals) and so the large effect size estimate was again likely to be subject  
323 to strong sampling effects (Table 4). The haplotype AGAGAAGAGA reduced female ACC by 2.2  
324 crossovers per gamete in heterozygous individuals ( $P < 0.05$ ; Table 4). The  $r^2$  LD between hap-  
325 lotype AGGAGAGAAG and the two most highly associated GWAS SNPs was 0.464 and 0.885  
326 for *cela1\_red\_10\_26005249* and *cela1\_red\_10\_25661750*, respectively; for haplotype AGA-  
327 GAAGAGA, it was 0.229 and 0.036 for *cela1\_red\_10\_26005249* and *cela1\_red\_10\_25661750*,  
328 respectively.

**Table 4:** Effect sizes for the most highly associated GWAS SNPs and for the AGGAGAGAAG haplotype at the most highly associated regional heritability region. Models were run for each sex separately and included a pedigree relatedness as a random effect. Count and ID Count indicate the number of ACC measures and the number of unique individuals for each genotype, respectively. Wald.P indicates the P-value for a Wald test of genotype as a fixed effect.

| Locus                   | Sex    | Genotype        | Count | ID Count | Solution | S.E.  | Z Ratio | Wald.P   |
|-------------------------|--------|-----------------|-------|----------|----------|-------|---------|----------|
| cela1_red_10_26005249   | Female | A/A (Intercept) | 98    | 28       | 29.575   | 0.732 | 40.43   | 3.43e-06 |
|                         |        | A/G             | 388   | 114      | -3.269   | 0.733 | -4.46   |          |
|                         |        | G/G             | 377   | 116      | -3.888   | 0.786 | -4.944  |          |
|                         | Male   | A/A (Intercept) | 27    | 6        | 24.405   | 0.964 | 25.327  | 8.90e-03 |
|                         |        | A/G             | 248   | 40       | -1.813   | 0.993 | -1.826  |          |
|                         |        | G/G             | 207   | 35       | -2.863   | 1.025 | -2.793  |          |
| cela1_red_10_25661750   | Female | A/A (Intercept) | 688   | 208      | 25.979   | 0.36  | 72.114  | 6.34e-10 |
|                         |        | A/G             | 168   | 48       | 2.026    | 0.56  | 3.619   |          |
|                         |        | G/G             | 7     | 2        | 13.684   | 2.386 | 5.736   |          |
|                         | Male   | A/A (Intercept) | 411   | 65       | 22.13    | 0.367 | 60.345  | 0.399    |
|                         |        | A/G             | 57    | 14       | 0.934    | 0.69  | 1.353   |          |
|                         |        | G/G             | 14    | 2        | 0.345    | 1.512 | 0.228   |          |
| Haplotype<br>AGGAGAGAAG | Female | A/A (Intercept) | 690   | 208      | 25.905   | 0.364 | 71.125  | 7.29e-09 |
|                         |        | A/B             | 160   | 46       | 2.387    | 0.573 | 4.166   |          |
|                         |        | B/B             | 13    | 4        | 8.701    | 1.73  | 5.029   |          |
|                         | Male   | A/A (Intercept) | 406   | 66       | 22.017   | 0.36  | 61.153  | 0.037    |
|                         |        | A/B             | 62    | 13       | 1.72     | 0.669 | 2.571   |          |
|                         |        | B/B             | 14    | 2        | 0.506    | 1.492 | 0.339   |          |
| Haplotype<br>AGAGAAGAGA | Female | A/A (Intercept) | 795   | 242      | 26.591   | 0.451 | 58.928  | 0.026    |
|                         |        | A/B             | 68    | 16       | -2.244   | 1.005 | -2.233  |          |
|                         | Male   | A/A (Intercept) | 481   | 80       | 22.279   | 0.351 | 63.403  | 0.775    |
|                         |        | A/B             | 1     | 1        | -1.122   | 3.925 | -0.286  |          |

## 329 Discussion

330 In this study, we have shown that autosomal crossover count (ACC) is 1.2 $\times$  higher in females  
331 than in males, with females exhibiting higher phenotypic and additive genetic variance for this  
332 trait; ACC was not significantly heritable in males. Almost all genetic variation in females was  
333 explained by a  $\sim$ 7Mb region on deer linkage group 12. This region contained several candidate  
334 genes, including *RNF212B* and *REC8*, which have previously been implicated in recombination  
335 rate variation in other mammal species, including humans, mice, cattle and sheep (KONG *et al.*,  
336 2008; REYNOLDS *et al.*, 2013; MA *et al.*, 2015; JOHNSTON *et al.*, 2016; PETIT *et al.*, 2017).  
337 Here, we discuss in detail the genetic architecture of individual recombination rate, candidate  
338 genes underlying heritable variation, sexual-dimorphism in this trait and its architecture, and the  
339 conclusions and implications of our findings for other studies of recombination in the wild.

340 **The genetic architecture of individual recombination rate.** Using complementary trait map-  
341 ping approaches, we identified a ~7Mb region on deer linkage group 12 (homologous to cattle  
342 chromosome 10) associated with ACC. The most highly associated GWAS region occurred at  
343 ~25.6 – 26Mb (relative to the cattle genome position), although this association was not signifi-  
344 cant at the genome-wide level. The most highly associated regional heritability region occurred  
345 between ~20.5 – 20.9MB, around 5Mb away from the top GWAS hits (Figure 4); association  
346 at this region was significant at the genome-wide level and explained almost all of the heritable  
347 variation in ACC in both sexes and in females only. Most variation in mean ACC was attributed  
348 to two haplotypes within this region (Tables 4 and S5; Figure S6).

349 At present, it is not clear why the results of the two analyses occur in close vicinity, yet do  
350 not overlap. Assuming homology with humans, cattle, sheep and mice (Ensembl release 91,  
351 ZERBINO *et al.* 2018), the two regions are separated by the highly repetitive T-cell receptor  
352 alpha/delta variable (TRAV/DV) locus, which may contain up to 400 TRAV/DV genes in cattle  
353 (REININK and VAN RHIJN 2009; Figure 4). This region is of an unknown size in deer; relative to  
354 the cattle genome, these regions are separated by 4.72Mb, but the deer linkage map distance  
355 is estimated as 1.86 centiMorgans (cM). The sex-averaged genome-wide recombination rate in  
356 deer is ~1.04cM/Mb, suggesting this genomic region may be shorter in deer (JOHNSTON *et al.*,  
357 2017) and that these two regions are in closer vicinity. This is supported by both the linkage  
358 map distance and patterns of linkage disequilibrium between the associated loci, particularly at  
359 the associated haplotypes (see Results & Figure 4). Another explanation may be that the small  
360 sample size used in the current study may result in increased sensitivity to sampling effects  
361 and bias in the estimation of the relative contribution of SNPs to the trait mean (GWAS) or  
362 variance (Regional heritability). Further investigation with higher samples sizes, whole genome  
363 sequencing approaches and improved genome assembly may allow more accurate determina-  
364 tion of the most likely candidate genes and potential causal mutations (coding or regulatory)  
365 within this population.

366 **Candidate genes for recombination rate variation.**

367 **Regional heritability analysis.** The most highly associated region in the regional heritability  
368 analysis contained the gene *REC8*, the protein of which is required for the separation of sister  
369 chromatids during meiosis (PARISI *et al.*, 1999). It also contained *RNF212B*, a paralogue of  
370 *RNF212*; the latter has been associated with recombination rate variation in humans, cattle and

371 sheep (KONG *et al.*, 2008; SANDOR *et al.*, 2012; JOHNSTON *et al.*, 2016; PETIT *et al.*, 2017), with  
372 the *REC8/RNF212B* region showing a stronger association with recombination rate in cattle  
373 (SANDOR *et al.*, 2012; MA *et al.*, 2015). A second region on deer linkage group 32 almost  
374 reached genome-wide significance (Figure 3, Tables 3 and S3). This region was relatively gene-  
375 poor, but contained containing ~6 genes, including the candidate topoisomerase (DNA) II beta  
376 (*TOP2B*): inhibitors of this gene lead to defects chromosome segregation and heterochromatin  
377 condensation during meiosis I in mice, *Drosophila melanogaster* and *Caenorhabditis elegans*  
378 (LI *et al.*, 2013; GÓMEZ *et al.*, 2014; HUGHES and HAWLEY, 2014; JARAMILLO-LAMBERT *et al.*,  
379 2016). No association was observed at the region homologous to *RNF212* (predicted to be  
380 at position ~109.2Mb on cattle chromosome 6, corresponding to ~57.576cM on deer linkage  
381 group 6) for the GWAS or regional heritability analysis.

382 **Genome-wide association study (GWAS).** Examination of annotated regions within 500kb  
383 of either side of the most significant GWAS SNPs identified three genes, TOX High Mobility  
384 Group Box Family Member 4 (*TOX4*), Chromodomain Helicase DNA Binding Protein 8 (*CHD8*)  
385 and SPT16 Homologue Facilitates Chromatin Remodelling Subunit (*SUPT16H*). These genes  
386 are involved in with chromatin binding and structure (*SP16H*, *TOX4*), histone binding (*CHD8*,  
387 *SUPT16H*), nucleosome organisation (*SP16H*) and cell cycle transition (*TOX4*). One of these  
388 genes, *SUPT16H*, interacts with NIMA related kinase 9 (*NEK9*), which is involved with mei-  
389 otic spindle organisation, chromosome alignment and cell cycle progression in mice (YANG  
390 *et al.*, 2012) and is a strong candidate locus for crossover interference in cattle (WANG *et al.*,  
391 2016). The SNP *cela1\_red\_10\_26005249* was ~825kb from Cyclin B1 Interacting Protein 1  
392 (*CCNB1IP1*), also known as Human Enhancer Of Invasion 10 (*HEI10*), which interacts with  
393 *RNF212* to allow recombination to progress into crossing-over in mice (QIAO *et al.*, 2014) and  
394 *Arabidopsis* (CHELYSHEVA *et al.*, 2012); this locus is also associated with recombination rate  
395 variation in humans (KONG *et al.*, 2014).

396 **Sexual dimorphism in genetic architecture of recombination rate.** The results of this anal-  
397 ysis suggest that there is sexual dimorphism in the genetic architecture of recombination rate  
398 variation in deer. Male ACC was not significantly heritable, although we could not rule out  
399 that this was a consequence of their smaller sample size relative to females (Figure S3). No re-  
400 gions of the genome were significantly associated with male ACC in the regional heritability and  
401 GWAS analyses, but sampling did indicate that differences observed between male and female

402 genomic associations were genuine (Figures S4 & S5). Investigation of genetic correlations  
403 between males and females was inconclusive, as the  $r_A$  of ACC was not significantly different  
404 from 0 or 1. The observed sex differences are consistent with previous studies of the genetic  
405 architecture of ACC in mammals, where a sexually-dimorphic architecture has been observed  
406 at the paralogous *RNF212* region in humans and sheep (KONG *et al.*, 2014; JOHNSTON *et al.*,  
407 2016). Nevertheless, some observed associations were stronger when considering both male  
408 and female deer in the same analysis, for example at the most highly associated GWAS SNP,  
409 and the amplified signal for the regional heritability analysis on linkage group 33 (Figures 2 &  
410 3), suggesting that there may be some degree of shared architecture within these regions.

411 **Conclusions and implications for studies of recombination in the wild.** We have shown  
412 that recombination rate is heritable in female red deer, and that it has a sexually dimorphic  
413 genetic architecture. Variants associated with recombination rate also affect this trait in other  
414 mammal species, supporting the idea that this trait has a conserved genetic architecture across  
415 distantly related taxa. A key motivation for this study is to compare how recombination rate and  
416 its genetic architecture is similar or different to that of model species that have experienced  
417 strong selection in their recent history, such as humans, cattle, mice and sheep. The heritability  
418 of recombination rate in deer was lower than that observed in other mammal systems (DUMONT  
419 *et al.*, 2009; KONG *et al.*, 2014; MA *et al.*, 2015; JOHNSTON *et al.*, 2016), with no observed her-  
420 itable variation present in male deer. Whilst we were able to test their effects, we found no  
421 contribution of contribution of individual and common environmental effects on recombination  
422 rate (i.e. age, year of birth, year of gamete transmission); indeed, most phenotypic variance  
423 in recombination was attributed to residual effects. This suggests that despite some under-  
424 lying genetic variation, recombination rate is mostly driven by stochastic effects, or otherwise  
425 unmeasured effects within our dataset.

426 This represents one of the smallest datasets in which recombination rate has been investigated,  
427 and so it may be that the observed effects are underestimated due to the small sample size,  
428 sampling effects, or perhaps that other genetic variants present in this species do not segre-  
429 gate in the Rum deer population. Nevertheless, identification of clear candidate genes and their  
430 effects on phenotype represents a valuable contribution to understanding the genetic architec-  
431 ture of recombination more broadly. Ultimately, our findings allow future investigation of the  
432 fitness consequences of variation in recombination rate and the relationship between identified

433 variants and individual life-history variation, to address questions on the maintenance of ge-  
434 netic variation for recombination rates, and the relative roles of selection, sexually antagonistic  
435 effects and stochastic processes in contemporary natural populations.

## 436 **Acknowledgements**

437 We thank A. Morris, S. Morris, M. Baker, P. Ellis, T. Clutton-Brock, F. Guinness, S. Albon and  
438 many others for collecting field data and DNA samples on long-term Rum deer project. We  
439 thank Scottish Natural Heritage for permission to work on the Isle of Rum National Nature  
440 Reserve, and the Wellcome Trust Clinical Research Facility Genetics Core in Edinburgh for  
441 performing the genotyping. This work has made extensive use of the resources provided by  
442 the University of Edinburgh Compute and Data Facility (<http://www.ecdf.ed.ac.uk/>). The long-  
443 term project on Rum deer is funded by the UK Natural Environment Research Council, and SNP  
444 genotyping was supported by a European Research Council Advanced Grant to J.M.P. S.E.J.  
445 is supported by a Royal Society University Research Fellowship.

## 446 **Author Contributions**

447 S.E.J and J.M.P. conceived the study. J.M.P and J.H. organised the collection of samples. J.H.  
448 conducted DNA sample extraction and genotyping. S.E.J. analysed the data and wrote the  
449 paper. All authors contributed to revisions.

## 450 **References**

451 ARBEITHUBER, B., A. J. BETANCOURT, T. EBNER, and I. TIEMANN-BOEGE, 2015 Crossovers  
452 are associated with mutation and biased gene conversion at recombination hotspots. *Proc.*  
453 *Natl. Acad. Sci. U.S.A.* **112**: 2109–2114.

454 AULCHENKO, Y. S., S. RIPKE, A. ISAACS, and C. M. VAN DUIJN, 2007 GenABEL: an R library  
455 for genome-wide association analysis. *Bioinformatics* **23**: 1294–1296.

- 456 BAKER, Z., M. SCHUMER, Y. HABA, L. BASHKIROVA, C. HOLLAND, *et al.*, 2017 Repeated losses  
457 of PRDM9-directed recombination despite the conservation of PRDM9 across vertebrates.  
458 eLife **6**: e24133.
- 459 BARTON, N. H., and B. CHARLESWORTH, 1998 Why sex and recombination? *Science* **74**:  
460 187–195.
- 461 BATTAGIN, M., G. GORJANC, A.-M. FAUX, S. E. JOHNSTON, and J. M. HICKEY, 2016 Effect of  
462 manipulating recombination rates on response to selection in livestock breeding programs.  
463 *Genet. Select. Evol.* **48**: 44.
- 464 BAUDAT, F., J. BUARD, C. GREY, A. FLEDEL-ALON, C. OBER, *et al.*, 2010 PRDM9 is a major  
465 determinant of meiotic recombination hotspots in humans and mice. *Science* **327**: 836–840.
- 466 BÉRÉDOS, C., P. A. ELLIS, J. G. PILKINGTON, S. H. LEE, J. GRATTEN, *et al.*, 2015 Hetero-  
467 geneity of genetic architecture of body size traits in a free-living population. *Mol. Ecol.* **24**:  
468 1810–1830.
- 469 BRAUNING, R., P. J. FISHER, A. F. MCCULLOCH, R. J. SMITHIES, J. F. WARD, *et al.*, 2015  
470 Utilization of high throughput genome sequencing technology for large scale single nucleotide  
471 polymorphism discovery in red deer and canadian elk. bioRxiv doi:10.1101/027318.
- 472 BURT, A., 2000 Sex, Recombination, and the Efficacy of Selection - was Weismann Right?  
473 *Evolution* **54**: 337–351.
- 474 BUTLER, D. G., B. R. CULLIS, A. R. GILMOUR, and B. J. GOGEL, 2009 Mixed Models for S  
475 language Environments: ASReml-R reference manual.
- 476 CHELYSHEVA, L., D. VEZON, A. CHAMBON, G. GENDROT, L. PEREIRA, *et al.*, 2012 The Ara-  
477 bidopsis HEI10 Is a New ZMM Protein Related to Zip3. *PLoS Genet.* **8**: e1002799.
- 478 CLUTTON-BROCK, T., F. GUINNESS, and S. ALBON, 1982 *Red Deer. Behaviour and Ecology of*  
479 *Two Sexes.*. University of Chicago Press.
- 480 DELANEAU, O., J.-F. ZAGURY, and J. MARCHINI, 2012 Improved whole-chromosome phasing  
481 for disease and population genetic studies. *Nat. Methods* **10**: 5–6.
- 482 DEVLIN, A. B., K. ROEDER, and B. DEVLIN, 1999 Genomic Control for Association. *Biometrics*  
483 **55**: 997–1004.



- 484 DUMONT, B. L., K. W. BROMAN, and B. A. PAYSEUR, 2009 Variation in genomic recombination  
485 rates among heterogeneous stock mice. *Genetics* **182**: 1345–9.
- 486 DUMONT, B. L., M. A. WHITE, B. STEFFY, T. WILTSHIRE, and B. A. PAYSEUR, 2011 Exten-  
487 sive recombination rate variation in the house mouse species complex inferred from genetic  
488 linkage maps. *Genome Res.* **21**: 114–125.
- 489 FELSENSTEIN, J., 1974 The evolutionary advantage of recombination. *Genetics* **78**: 737–756.
- 490 GÓMEZ, R., A. VIERA, I. BERENQUER, E. LLANO, A. M. PENDÁS, *et al.*, 2014 Cohesin removal  
491 precedes topoisomerase II $\alpha$ -dependent decatenation at centromeres in male mammalian  
492 meiosis II. *Chromosoma* **123**: 129–146.
- 493 GONEN, S., M. BATTAGIN, S. JOHNSTON, G. GORJANC, and J. HICKEY, 2017 The potential of  
494 shifting recombination hotspots to increase genetic gain in livestock breeding. *Genet. Select.*  
495 *Evol.* **49**: 55.
- 496 GREEN, P., K. FALLS, and S. CROOKS, 1990 *Documentation for CRIMAP, version 2.4*. Wash-  
497 ington University School of Medicine.
- 498 HASSOLD, T., and P. HUNT, 2001 To err (meiotically) is human: the genesis of human aneu-  
499 ploidy. *Nat. Rev. Genet.* **2**: 280–291.
- 500 HENDERSON, C. R., 1975 Best linear unbiased estimation and prediction under a selection  
501 model. *Biometrics* **31**: 423–447.
- 502 HILL, W. G., and A. ROBERTSON, 1966 The effect of linkage on limits to artificial selection.  
503 *Genet. Res.* **8**: 269–294.
- 504 HUGHES, S. E., and R. S. HAWLEY, 2014 Topoisomerase II Is Required for the Proper Sepa-  
505 ration of Heterochromatic Regions during *Drosophila melanogaster* Female Meiosis. *PLoS*  
506 *Genet.* **10**: e1004650.
- 507 HUISMAN, J., 2017 Pedigree reconstruction from SNP data: parentage assignment, sibship  
508 clustering and beyond. *Mol. Ecol. Resour.* **17**: 1009–1024.
- 509 HUISMAN, J., L. E. B. KRUIK, P. A. ELLIS, T. CLUTTON-BROCK, and J. M. PEMBERTON, 2016  
510 Inbreeding depression across the lifespan in a wild mammal population. *Proc. Natl. Acad.*  
511 *Sci. U.S.A.* **113**: 3585–3590.

- 512 INOUE, K., and J. R. LUPSKI, 2002 Molecular mechanisms for genomic disorders. *Ann. Rev.*  
513 *Genomics Hum. Genet.* **3**: 199–242.
- 514 JARAMILLO-LAMBERT, A., A. S. FABRITIUS, T. J. HANSEN, H. E. SMITH, and A. GOLDEN, 2016  
515 The Identification of a Novel Mutant Allele of topoisomerase II in *Caenorhabditis elegans*  
516 Reveals a Unique Role in Chromosome Segregation During Spermatogenesis. *Genetics*  
517 **204**: 1407–1422.
- 518 JOHNSTON, S. E., C. BÉRÉÑOS, J. SLATE, and J. M. PEMBERTON, 2016 Conserved genetic  
519 architecture underlying individual recombination rate variation in a wild population of soay  
520 sheep (*ovis aries*). *Genetics* **203**: 583–598.
- 521 JOHNSTON, S. E., J. HUISMAN, P. A. ELLIS, and J. M. PEMBERTON, 2017 A High Density Link-  
522 age Map Reveals Sexual Dimorphism in Recombination Landscapes in Red Deer (*Cervus*  
523 *elaphus*). *G3 (Bethesda)* **7**: 2859–2870.
- 524 KAWAKAMI, T., C. F. MUGAL, A. SUH, A. NATER, R. BURRI, *et al.*, 2017 Whole-genome patterns  
525 of linkage disequilibrium across flycatcher populations clarify the causes and consequences  
526 of fine-scale recombination rate variation in birds. *Mol. Ecol.* **26**: 4158–4172.
- 527 KONG, A., J. BARNARD, D. F. GUDBJARTSSON, G. THORLEIFSSON, G. JONSDOTTIR, *et al.*,  
528 2004 Recombination rate and reproductive success in humans. *Nat. Genet.* **36**: 1203–1206.
- 529 KONG, A., G. THORLEIFSSON, M. L. FRIGGE, G. MASSON, D. F. GUDBJARTSSON, *et al.*, 2014  
530 Common and low-frequency variants associated with genome-wide recombination rate. *Nat.*  
531 *Genet.* **46**: 11–6.
- 532 KONG, A., G. THORLEIFSSON, H. STEFANSSON, G. MASSON, A. HELGASON, *et al.*, 2008  
533 Sequence variants in the RNF212 gene associate with genome-wide recombination rate.  
534 *Science* **319**: 1398–1401.
- 535 LI, X.-M., C. YU, Z.-W. WANG, Y.-L. ZHANG, X.-M. LIU, *et al.*, 2013 DNA Topoisomerase  
536 II Is Dispensable for Oocyte Meiotic Resumption but Is Essential for Meiotic Chromosome  
537 Condensation and Separation in Mice. *Biol. Reprod.* **89**: 118, 1–11.
- 538 MA, L., J. R. O'CONNELL, P. M. VANRADEN, B. SHEN, A. PADHI, *et al.*, 2015 Cattle Sex-  
539 Specific Recombination and Genetic Control from a Large Pedigree Analysis. *PLoS Genet.*  
540 **11**: e1005387.

- 541 MOSKVINA, V., and K. M. SCHMIDT, 2008 On multiple-testing correction in genome-wide asso-  
542 ciation studies. *Genet. Epidemiol.* **32**: 567–573.
- 543 MULLER, H., 1964 The relation of recombination to mutational advance. *Mutat. Res.* **1**: 2–9.
- 544 MUÑOZ-FUENTES, V., M. MARCET-ORTEGA, G. ALKORTA-ARANBURU, C. LINDE FORSBERG,  
545 J. M. MORRELL, *et al.*, 2015 Strong Artificial Selection in Domestic Mammals Did Not Result  
546 in an Increased Recombination Rate. *Mol. Biol. Evol.* **32**: 510–523.
- 547 MYERS, S., L. BOTTOLO, C. FREEMAN, G. MCVEAN, and P. DONNELLY, 2005 A fine-scale map  
548 of recombination rates and hotspots across the human genome. *Science* **310**: 321–4.
- 549 NAGAMINE, Y., R. PONG-WONG, P. NAVARRO, V. VITART, C. HAYWARD, *et al.*, 2012 Localis-  
550 ing Loci underlying Complex Trait Variation Using Regional Genomic Relationship Mapping.  
551 *PLoS ONE* **7**: e46501.
- 552 O’CONNELL, J., D. GURDASANI, O. DELANEAU, N. PIRASTU, S. ULIVI, *et al.*, 2014 A General  
553 Approach for Haplotype Phasing across the Full Spectrum of Relatedness. *PLoS Genet.* **10**:  
554 e1004234.
- 555 OTTO, S. P., and N. H. BARTON, 2001 Selection for recombination in small populations. *Evolu-  
556 tion* **55**: 1921–1931.
- 557 OTTO, S. P., and T. LENORMAND, 2002 Resolving the paradox of sex and recombination. *Nat.  
558 Rev. Genet.* **3**: 252–261.
- 559 PARISI, S., M. J. MCKAY, M. MOLNAR, M. A. THOMPSON, P. J. VAN DER SPEK, *et al.*, 1999  
560 Rec8p, a Meiotic Recombination and Sister Chromatid Cohesion Phosphoprotein of the  
561 Rad21p Family Conserved from Fission Yeast to Humans. *Mol. Cell. Biol.* **19**: 3515–3528.
- 562 PETIT, M., J.-M. ASTRUC, J. SARRY, L. DROUILHET, S. FABRE, *et al.*, 2017 Variation in Recom-  
563 bination Rate and Its Genetic Determinism in Sheep Populations. *Genetics* **207**: 767–784.
- 564 QIAO, H., H. B. D. P. RAO, Y. YANG, J. H. FONG, J. M. CLOUTIER, *et al.*, 2014 Antagonistic  
565 roles of ubiquitin ligase HEI10 and SUMO ligase RNF212 regulate meiotic recombination.  
566 *Nat. Genet.* **46**: 194–199.
- 567 REININK, P., and I. VAN RHIJN, 2009 The bovine T cell receptor alpha/delta locus contains over  
568 400 V genes and encodes V genes without CDR2. *Immunogenetics* **61**: 541–549.

- 569 REYNOLDS, A., H. QIAO, Y. YANG, J. K. CHEN, N. JACKSON, *et al.*, 2013 RNF212 is a dosage-  
570 sensitive regulator of crossing-over during mammalian meiosis. *Nat. Genet.* **45**: 269–78.
- 571 RÖNNEGÅRD, L., S. E. MCFARLANE, A. HUSBY, T. KAWAKAMI, H. ELLEGREN, *et al.*, 2016 In-  
572 creasing the power of genome wide association studies in natural populations using repeated  
573 measures: evaluation and implementation. *Methods Ecol. Evol.* **7**: 792–799.
- 574 SANDOR, C., W. LI, W. COPPIETERS, T. DRUET, C. CHARLIER, *et al.*, 2012 Genetic variants in  
575 *REC8*, *RNF212*, and *PRDM9* influence male recombination in cattle. *PLoS Genet.* **8**: 1–13.
- 576 SHIN, J.-H., S. BLAY, B. MCNENEY, and J. GRAHAM, 2006 Ldheatmap: An r function for  
577 graphical display of pairwise linkage disequilibria between single nucleotide polymorphisms.  
578 *J. Stat. Soft.* **16**: Code Snippet 3.
- 579 STAPLEY, J., P. G. D. FEULNER, S. E. JOHNSTON, A. W. SANTURE, and C. M. SMADJA,  
580 2017 Variation in recombination frequency and distribution across Eukaryotes: patterns and  
581 processes. *Philos. Trans. R. Soc. Lond., B, Biol. Sci.* **372**: 20160455.
- 582 THEODOSIOU, L., W. O. McMILLAN, and O. PUEBLA, 2016 Recombination in the eggs and  
583 sperm in a simultaneously hermaphroditic vertebrate. *Philos. Trans. R. Soc. Lond., B, Biol.*  
584 *Sci.* **283**: 20161821.
- 585 WANG, Z., B. SHEN, J. JIANG, J. LI, and L. MA, 2016 Effect of sex, age and genetics on  
586 crossover interference in cattle. *Sci. Rep.* **6**: 37698.
- 587 YANG, J., S. H. LEE, M. E. GODDARD, and P. M. VISSCHER, 2011 GCTA: a tool for genome-  
588 wide complex trait analysis. *Am. J. Hum. Genet.* **88**: 76–82.
- 589 YANG, S.-W., C. GAO, L. CHEN, Y.-L. SONG, J.-L. ZHU, *et al.*, 2012 NEK9 regulates spindle  
590 organization and cell cycle progression during mouse oocyte meiosis and its location in early  
591 embryo mitosis. *Cell Cycle* **11**: 4366–4377.
- 592 ZERBINO, D. R., P. ACHUTHAN, W. AKANNI, M. AMODE, D. BARRELL, *et al.*, 2018 Ensembl  
593 2018. *Nucleic Acids Res.* **46**: D754–D761.
